# Supplementary material for: Magnetic Ion-Imprinted Materials for Selective Adsorption of Cr(VI): Adsorption Behavior and Mechanism Study
Source: MDPI journal article supplement (doi:10.3390/molecules29091952), 2024-04-24
Supplement: s1 [file s1]

Supplementary Material

for

# **Magnetic Ion-Imprinted Materials for Selective Adsorption of Cr (VI): Adsorption Behavior and Mechanism Study**

**Shunfei Li, Siqing Ye, Weiye Zhang, Hongxing He \*, Yi Zhang, Mingyang Xiong, Yuhan Chen, Mingqiu Wang and Zhifeng Nie \***

Yunnan Key Laboratory of Metal-Organic Molecular Materials and Device,  
School of Chemistry and Chemical Engineering, Kunming University,  
Kunming 650214, China

\* Correspondence: hxhe0212@kmu.edu.cn (H.H.); niezf123@163.com (Z.N.)

### *S1 Reagents*

$\text{FeCl}_3 \cdot 6\text{H}_2\text{O}$  and  $\text{FeSO}_4 \cdot 7\text{H}_2\text{O}$  were purchased from Windship Chemical Reagent Technology Co. Ltd (Tianjin, China).  $\text{Cd}(\text{NO}_3)_2 \cdot 4\text{H}_2\text{O}$  was sourced from Beijing Chemical Factory (Beijing, China).  $\text{K}_2\text{CrO}_7$  was purchased from Chengdu Colony Chemicals Co. Biochemical Technology Co. (Shanghai, China). Graphene oxide (GO) was obtained from Macklin Biochemical Technology Co. (Shanghai, China). All chemicals utilized in the experiments met analytical grade standards or higher. Deionized water was employed in the preparation of all aqueous solutions

### *S2 Instruments and Equipment*

The pH was measured with a pH meter (PHS-3C, NESA, Shanghai). Infrared measurements were conducted using a Fourier Transform Infrared (FTIR) spectrometer (Cary 6400, Agilent). Sample morphology and microstructure were examined with a high-resolution transmission electron microscope (HRTEM; JEOL JEM-2100, Hitachi). Thermal stability analysis was performed through thermogravimetric analysis (TG; Hitachi). X-ray diffraction (XRD) patterns were obtained using an X-ray diffractometer (D2 PHASER, Bruker). X-ray photoelectron spectroscopy (XPS) analyses were carried out with a Thermo Escalab 250 Xi spectrometer. Metal ion concentrations were determined by inductively coupled plasma atomic emission spectrometry (ICP-AES; Icap-6300, Thermo Scientific). Magnetic field strength was measured using a vibrating sample magnetometer (VSM; MPMSXL, Quantum Design).

### *S3 Preparation of Magnetic $\text{Fe}_3\text{O}_4$ @GO Nanocomposite Matrices*

Initially, 12 g of  $\text{FeCl}_3 \cdot 6\text{H}_2\text{O}$  and 6.116 g of  $\text{FeSO}_4 \cdot 7\text{H}_2\text{O}$  were dissolved ultrasonically in 100 mL of deionized water, and the solution was then transferred to a 250 mL three-necked flask. The experimental setup was arranged, and the mixture was stirred under a nitrogen atmosphere for 30 minutes at room temperature. Subsequently, the pH was adjusted to 11 by adding ammonia, and the reaction proceeded under nitrogen and heating at  $60^\circ\text{C}$  for 1 hour. Following this, the reaction was allowed to proceed at room temperature for an additional 2 hours. The resulting product was washed with deionized water until neutral, dried, and subsequently ground to yield  $\text{Fe}_3\text{O}_4$  nanoparticles.

Subsequently, 0.2 g of  $\text{Fe}_3\text{O}_4$  was dissolved ultrasonically in 30 mL of anhydrous ethanol and dispersed through ultrasonication for 1 hour. Following this, two drops of 2-acryloyl-2-methylpropionic acid (APTES) were introduced to the solution and thoroughly stirred for 2 hours. Subsequently, 10 mL of a 10 g/L aqueous graphene oxide (GO) solution was slowly added dropwise to the mixed reaction solution. The resulting mixture was then transferred to an autoclave and heated to  $200 \pm 1^\circ\text{C}$  for 24 hours. The reaction was conducted within the autoclave. Upon cooling, the black solid product was retrieved using a magnet, washed multiple times with ethanol and subsequently with deionized water, and finally dried under vacuum at  $60^\circ\text{C}$  for 12 hours to yield  $\text{Fe}_3\text{O}_4$ @GO.

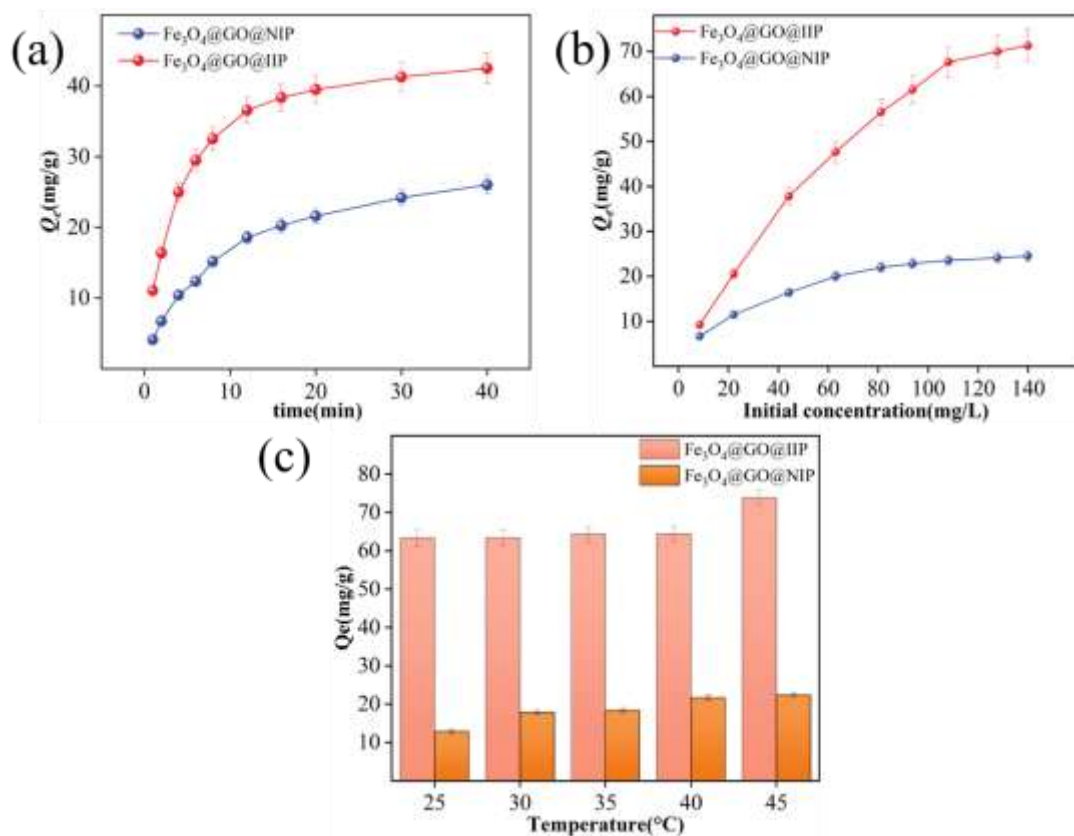

**Figure. S1** (a) Effect of time on adsorption, (b) Effect of initial Cr (VI) concentration on adsorption, (c) Effect of temperature on adsorption.

**Table S1.** Correlated calculated values of the Fukui function for sites susceptible to nucleophilic  $[f(r)^+]$  and electrophilic  $[f(r)^-]$  attack by 4 VP and protonated 4VP. Atoms are labeled as in Figure 9 (a) and (b).

| Number | Atom | $f(r)^+$ | $f(r)^-$ | Number | Atom | $f(r)^+$ | $f(r)^-$ |
|--------|------|----------|----------|--------|------|----------|----------|
| 6      | N    | 0.125    | 0.117    | 6      | N    | 0.092    | 0.065    |
| 7      | C    | 0.069    | 0.179    | 7      | C    | 0.009    | 0.271    |
| 9      | H    | 0.025    | 0.022    | 9      | H    | 0.028    | 0.017    |
| 12     | H    | 0.027    | 0.022    | 12     | H    | 0.031    | 0.017    |
|        |      |          |          | 13     | H    | 0.035    | 0.018    |

**Table S2.** extended charge decomposition analysis (CDA) results for protonated 4VP-Cr (VI).

| Orb. | d         | b         | b-d       | r         |
|------|-----------|-----------|-----------|-----------|
| 1    | 0         | -0.000001 | 0.000001  | 0         |
| 2    | 0         | 0.000013  | -0.000013 | 0         |
| 3    | 0         | -0.000001 | 0.000001  | 0         |
| 4    | 0         | -0.000002 | 0.000002  | 0         |
| 5    | 0         | 0.000001  | -0.000001 | 0         |
| 6    | 0         | 0.000022  | -0.000023 | -0.000001 |
| 7    | 0         | -0.000001 | 0         | 0         |
| 8    | 0         | -0.000003 | 0.000003  | 0         |
| 9    | -0.000001 | 0.000272  | -0.000273 | 0.000016  |
| 10   | -0.000029 | -0.000009 | -0.00002  | -0.000015 |
| 11   | -0.000001 | 0         | -0.000001 | -0.000001 |
| 12   | -0.000001 | -0.000001 | -0.000001 | -0.000003 |
| 13   | 0         | 0         | 0         | 0         |
| 14   | 0         | 0         | 0         | 0         |
| 15   | 0.000001  | 0         | 0.000001  | 0         |
| 16   | 0         | 0         | 0         | 0         |
| 17   | 0         | 0         | 0         | 0         |
| 18   | -0.000001 | 0.000348  | -0.000349 | 0.000008  |
| 19   | -0.000001 | 0.000199  | -0.0002   | 0.000008  |
| 20   | 0         | 0.00004   | -0.00004  | 0.000004  |
| 21   | -0.000005 | -0.000028 | 0.000024  | -0.000006 |
| 22   | -0.000279 | 0.000069  | -0.000348 | 0.002298  |
| 23   | -0.000008 | 0.002677  | -0.002685 | 0.00241   |
| 24   | 0.000157  | -0.000172 | 0.00033   | 0.003196  |
| 25   | 0.000037  | 0.007663  | -0.007626 | 0.019679  |
| 26   | 0.000134  | 0.000038  | 0.000096  | -0.000149 |
| 27   | -0.000086 | 0.00426   | -0.004346 | 0.012144  |
| 28   | -0.000005 | 0.000075  | -0.00008  | 0.000161  |
| 29   | 0.0002    | 0.001847  | -0.001646 | -0.008113 |
| 30   | 0.00011   | 0.000218  | -0.000109 | -0.001322 |
| 31   | 0.000122  | 0.000224  | -0.000102 | -0.00197  |
| 32   | 0.001257  | 0.000388  | 0.000869  | 0.000407  |
| 33   | 0.000477  | 0.000593  | -0.000117 | 0.00023   |
| 34   | -0.000024 | 0.00002   | -0.000044 | 0.000482  |
| 35   | -0.000276 | 0.000004  | -0.00028  | 0.003199  |
| 36   | 0.000198  | -0.000046 | 0.000244  | 0.003124  |
| 37   | 0.000361  | -0.000042 | 0.000404  | 0.003887  |
| 38   | 0.000246  | 0.000005  | 0.000241  | 0.001226  |
| 39   | -0.00013  | -0.00005  | -0.000081 | 0.002849  |

|    |           |           |           |           |
|----|-----------|-----------|-----------|-----------|
| 40 | -0.000523 | -0.000138 | -0.000385 | 0.010485  |
| 41 | 0.000015  | 0.0006    | -0.000584 | 0.003686  |
| 42 | -0.000015 | 0.000064  | -0.000079 | -0.003461 |
| 43 | -0.000013 | 0.000031  | -0.000044 | 0.001312  |
| 44 | 0.000243  | -0.000022 | 0.000265  | 0.000532  |
| 45 | 0.000525  | 0.015924  | -0.015399 | -0.019176 |
| 46 | -0.000027 | 0.000581  | -0.000607 | -0.000943 |
| 47 | 0.000099  | 0.004478  | -0.00438  | -0.001192 |
| 48 | 0.001186  | 0.034069  | -0.032883 | -0.038244 |
| 49 | 0.00058   | 0.000745  | -0.000165 | -0.002135 |
| 50 | -0.000111 | 0.000423  | -0.000534 | -0.001708 |
| 51 | 0.000159  | -0.000038 | 0.000197  | 0.000814  |
| 52 | -0.000074 | 0.002999  | -0.003073 | -0.002193 |
| 53 | 0.000746  | 0.032337  | -0.031591 | -0.028732 |
| 54 | 0.000342  | 0.018757  | -0.018415 | -0.022138 |
| 55 | -0.000014 | 0.003441  | -0.003454 | -0.003858 |
| 56 | -0.000378 | 0.007923  | -0.008301 | -0.013638 |
| 57 | 0.000026  | 0.002528  | -0.002502 | -0.002121 |
| 58 | 0         | 0         | 0         | 0         |
| 59 | 0         | 0         | 0         | 0         |
| 60 | 0         | 0         | 0         | 0         |
| 61 | 0         | 0         | 0         | 0         |

d = The number of electrons donated from fragment 1 (HCrO4-) to fragment 2 (Protonation 4VP)

b = The number of electrons back donated from fragment 2 (Protonation 4VP) to fragment 1 (HCrO4-)

r = The number of electrons involved in repulsive polarization

### Extended Charge decomposition analysis (ECDA)

Contribution to all occupied complex orbital:

Occupied, virtual orbitals of fragment 1: 2798.3347% 11.7046%

Occupied, virtual orbitals of fragment 2: 2888.9294% 1.0312%

Contribution to all virtual complex orbital:

Occupied, virtual orbitals of 4-VP: 1.6653% 12388.2954%

Occupied, virtual orbitals of HCrO4: 11.0706% 6298.9688%

PL( 1) + CT( 1-> 2) = 0.0333 PL( 1) + CT( 2-> 1) = 0.2341

PL( 2) + CT( 1-> 2) = 0.0206 PL( 2) + CT( 2-> 1) = 0.2214

The net electrons obtained by fragment 1 = CT( 1-> 2) - CT( 2-> 1) = -0.2008
